# Supplementary material for: Tissue- and time-directed electroporation of CAS9 protein–gRNA complexes in vivo yields efficient multigene knockout for studying gene function in regeneration
Source: PubMed Central journal article supplement — NPJ Regen Med. 2016 Jun 9;1:16002–. doi: 10.1038/npjregenmed.2016.2 (PMC5744710; doi:10.1038/npjregenmed.2016.2), 2016-06-09
Supplement: npjregenmed20162-s1.pdf [file npjregenmed20162-s1.pdf]

## **Supplementary information**

### **Tissue and time-directed electroporation of Cas9 protein-gRNA complexes in vivo yields efficient multigene knockout for studying gene function in regeneration**

Ji-Feng Fei<sup>1\*</sup>, Dunja Knapp<sup>1</sup>, Maritta Schuez<sup>1</sup>, Prayag Murawala<sup>1</sup>, Yan Zou<sup>1</sup>, Sumeet Pal Singh<sup>1</sup>, David Drechsel<sup>2</sup> and Elly M. Tanaka<sup>1\*</sup>

Supplementary Materials and Methods: list of primers and gene sequences.

Supplementary Figure S1: Knockout of *GFP* in the axolotl spinal cord.

Supplementary Figure S2: Knockout of *Sox2* in the axolotl spinal cord.

Supplementary Figure S3: Knockout of *GFP* in the tail skin cells through CAS9-gRNA complex electroporation.

## Supplementary Materials and Methods

### List of primers:

For pCAGGS-*Cas9* cloning:

Cas9-for: 5'

CATTTTGGCAAAGAATTATTCCGCTAGCCGCCACCATGGATAAGAAATAC  
TCAATAG

Cas9-rev: 5'

GCAGCCTGCACCTGAGGAGTGGATCCTTACTTGTACACTCATCCTGCAGCT  
CCACCG

For pOCC97-*Cas9-NLS* cloning:

Cas9-for2: 5' GGGCCGGCGGCCGCAATGGATAAGAAATACTCAATAG

Cas9-rev2: 5' 5' CTATTACGGCGCGCCTCATCCTGCAGCTCCACCG.

### List of gene sequences:

RGR-*GFP*-gRNA (IDT):

TAGTAAACCGGTGATTTCGTCAGTAGGGTTGTAAAGGTTTTTCTTTTCCTGA  
GAAAACAACCTTTTGTTCAGGTTTTGCTTTTGGCCTTCCCTAGCTT  
TAAAAAAAAAAAAAGCAAAAGTGGCCctgatgagtcctgaggacgaaacgagtaagctcgtc  
GGCCACAAGTTCAGCGTGTCgttttagagctagaaatagcaagttaaataaggctagtccttatcaact  
tgaaaagtggcaccgagtcggtgcttttggccggcatgtcccagcctcctcgtggcgccggctgggcaacatgcttc  
ggcatggcgaatgggacCCCGGGATGCTA

RGR-*Sox2*-gRNA (IDT):

TAGTAAACCGGTGATTTCGTCAGTAGGGTTGTAAAGGTTTTTCTTTTCCTGA  
GAAAACAACCTTTTGTTCAGGTTTTGCTTTTGGCCTTCCCTAGCTT  
TAAAAAAAAAAAAAGCAAAAACCTCCctgatgagtcctgaggacgaaacgagtaagctcgtcG  
GAGGTCTGCTGCGGGGCGGgttttagagctagaaatagcaagttaaataaggctagtccttatcaactt  
gaaaagtggcaccgagtcggtgcttttggccggcatgtcccagcctcctcgtggcgccggctgggcaacatgcttcg  
gcatggcgaatgggacCCCGGGATGCTA

RGR-*Tyr*-gRNA (IDT):

TAGTAAACCGGTGATTTCGTCAGTAGGGTTGTAAAGGTTTTTCTTTTCCTGA  
GAAAACAACCTTTTGTTCAGGTTTTGCTTTTGGCCTTCCCTAGCTT  
TAAAAAAAAAAAAAGCAAAAAGTCCctgatgagtcctgaggacgaaacgagtaagctcgtcG  
GACTTCACTATCCCCTACTgttttagagctagaaatagcaagttaaataaggctagtccttatcaacttga  
aaaagtggcaccgagtcggtgcttttggccggcatgtcccagcctcctcgtggcgccggctgggcaacatgcttcg  
atggcgaatgggacCCCGGGATGCTA

Cas9-NLS expressing cassette in pOCC97 vector:

ATGGATAAGAAATACTCAATAGGCTTAGATATCGGCACAAATAGCGTCGG  
ATGGGCGGTGATCACTGATGAATATAAGGTTCCGTCTAAAAAGTTCAAGG  
TTCTGGGAAATACAGACCGCCACAGTATCAAAAAAATCTTATAGGGGCT  
CTTTTATTTGACAGTGGAGAGACAGCGGAAGCGACTCGTCTCAAACGGAC  
AGCTCGTAGAAGGTATACACGTCGGAAGAATCGTATTTGTTATCTACAGG  
AGATTTTTTCAAATGAGATGGCGAAAGTAGATGATAGTTTCTTTCATCGAC  
TTGAAGAGTCTTTTTTGGTGGGAAGAAGACAAGAAGCATGAACGTCATCCT

ATTTTTGGAAATATAGTAGATGAAGTTGCTTATCATGAGAAATATCCA  
ACTATCTATCATCTGCGAAAAAATTGGTAGATTCTACTGATAAAGCGGATTT  
GCGCTTAATCTATTTGGCCTTAGCGCATATGATTAAGTTTCGTGGTCATTT  
TTTGATTGAGGGAGATTTAAATCCTGATAATAGTGATGTGGACAACTAT  
TTATCCAGTTGGTACAAACCTACAATCAATTATTTGAAGAAAACCCTATTA  
ACGCAAGTGGAGTAGATGCTAAAGCGATTCTTTCTGCACGATTGAGTAAA  
TCAAGACGATTAGAAAATCTCATTGCTCAGCTCCCCGGTGAGAAGAAAA  
TGGCTTATTTGGGAATCTCATTGCTTTGTCATTGGGTTTGACCCCTAATTTT  
AAATCAAATTTTGATTGGCAGAAGATGCTAAATTACAGCTTTCAAAAGA  
TACTTACGATGATGATTTAGATAATTTATTGGCGCAAATTGGAGATCAATA  
TGCTGATTTGTTTTTGGCAGCTAAGAATTTATCAGATGCTATTTTACTTTCA  
GATATCCTAAGAGTAAATACTGAAATAACTAAGGCTCCCCTATCAGCTTC  
AATGATTAACGCTACGATGAACATCATCAAGACTTGACTCTTTTAAAAG  
CTTTAGTTCGACAACAACCTTCCAGAAAAGTATAAAGAAATCTTTTTTGATC  
AATCAAAAAACGGATATGCAGGTTATATTGATGGGGGAGCTAGCCAAGA  
AGAATTTTATAAATTTATCAAACCAATTTTAGAAAAAATGGATGGTACTG  
AGGAATTATTGGTGAAACTAAATCGTGAAGATTTGCTGCGCAAGCAACGG  
ACCTTTGACAACGGCTCTATTTCCCATCAAATTCACTTGGGTGAGCTGCAT  
GCTATTTTGAGAAGACAAGAAGACTTTTATCCATTTTAAAAGACAATCGT  
GAGAAGATTGAAAAAATCTTGACTTTTCGAATTCCTTATTATGTTGGTCCA  
TTGGCGCGTGGCAATAGTCGTTTTGCATGGATGACTCGGAAGTCTGAAGA  
ACAATTACCCCATGGAATTTGAAGAAGTTGTCGATAAAGGTGCTTCAG  
CTCAATCATTATTGAACGCATGACAACTTTGATAAAAAATCTTCCAAATG  
AAAAAGTACTACCAAAACATAGTTTGCCTTATGAGTATTTTACGGTTTATA  
ACGAATTGACAAAGGTCAAATATGTTACTGAAGGAATGCGAAAACCAGC  
ATTTCTTTCAGGTGAACAGAAGAAAGCCATTGTTGATTTACTCTTCAAAC  
AAATCGAAAAGTAACCGTTAAGCAATTAAGAAGATTATTTCAAAAAA  
ATAGAATGTTTTGATAGTGTTGAAATTTTCCAGGAGTTGAAGATAGATTTAAT  
GCTTCATTAGGTACCTACCATGATTTGCTAAAAATTATTAAAGATAAAGAT  
TTTTTGGATAATGAAGAAAATGAAGATATCTTAGAGGATATTGTTTTAAC  
ATTGACCTTATTTGAAGATAGGGAGATGATTGAGGAAAGACTTAAAACAT  
ATGCTCACCTCTTTGATGATAAAGGTGATGAAACAGCTTAAACGTCGCCGTT  
ATACTGGTTGGGGACGTTTGTCTCGAAAATTGATTAATGGTATTAGGGAT  
AAGCAATCTGGCAAAACAATATTAGATTTTTTTGAAATCAGATGGTTTTGCC  
AATCGCAATTTTATGCAGCTGATCCATGATGATAGTTTGACATTTAAAGAA  
GACATTCAAAAGCACAAGTGTCTGGACAAGGCGATAGTTTACATGAACA  
TATTGCAAATTTAGCTGGTAGCCCTGCTATTAAAAAAGGTATTTTACAGAC  
TGTA AAAAGTTGTTGATGAATTGGTCAAAGTAATGGGGCGGCATAAGCCAG  
AAAATATCGTTATTGAAATGGCACGTGAAAATCAGACAACCTCAAAGGGC  
CAGAAAAATTCGCGAGAGCGTATGAAACGAATCGAAGAAGGTATCAAAG  
AATTAGGAAGTCAGATTCTTAAAGAGCATCCTGTTGAAAATACTCAATTG  
CAAATGAAAAGCTCTATCTCTATTATCTCCAAAATGGAAGAGACATGTA  
TGTGGACCAAGAATTAGATATTAATCGTTTAAGTGATTATGATGTCGATCA  
CATTTGTTCCACAAAGTTTCTTAAAGACGATTCAATAGACAATAAGGTCTT  
AACGCGTTCTGATAAAAAATCGTGGTAAATCGGATAACGTTCCAAGTGAAG  
AAGTAGTCAAAAAGATGAAAACCTATTGGAGACAACCTTCTAAACGCCAA  
GTTAATCACTCAACGTAAGTTTGATAATTTAACGAAAGCTGAACGTGGAG  
GTTTGAGTGAACCTTGATAAAGCTGGTTTTATCAAACGCCAATTGGTTGAA  
ACTCGCCAAATCACTAAGCATGTGGCACAAATTTTGGATAGTCGCATGAA  
TACTAAATACGATGAAAATGATAAACTTATTCGAGAGGTTAAAGTGATTA

CCTTAAAATCTAAATTAGTTTCTGACTTCCGAAAAGATTTCCAATTCTATA  
AAGTACGTGAGATTAACAATTACCATCATGCCCATGATGCGTATCTAAAT  
GCCGTCGTTGGAACCTGCTTTGATTAAGAAATATCCAAAACCTTGAATCGGA  
GTTTGTCTATGGTGATTATAAAGTTTATGATGTTTCGTAAAATGATTGCTAA  
GTCTGAGCAAGAAATAGGCAAAGCAACCGCAAAATATTTCTTTTACTCTA  
ATATCATGAACTTCTTCAAACAGAAATTACACTTGCAAATGGAGAGATT  
CGCAAACGCCCTCTAATCGAAACTAATGGGGAAACTGGAGAAATTGTCTG  
GGATAAAGGGCGAGATTTTGCCACAGTGCGCAAAGTATTGTCCATGCCCC  
AAGTCAATATTGTCAAGAAAACAGAAGTACAGACAGGCGGATTCTCCAA  
GGAGTCAATTTTACCAAAAAGAAATTCGGACAAGCTTATTGCTCGTAAAA  
AAGACTGGGATCCAAAAAATATGGTGGTTTTGATAGTCCAACGGTAGCT  
TATTCAGTCCTAGTGGTTGCTAAGGTGGAAAAGGGAAATCGAAGAAGTT  
AAAATCCGTTAAAGAGTTACTAGGGATCACAATTATGGAAAGAAGTTCCT  
TTGAAAAAATCCGATTGACTTTTTAGAAAGCTAAAGGATATAAGGAAGTT  
AAAAAAGACTTAATCATTAAACTACCTAAATATAGTCTTTTTGAGTTAGA  
AAACGGTCGTAAACGGATGCTGGCTAGTGCCGGAGAATTACAAAAGGA  
AATGAGCTGGCTCTGCCAAGCAAATATGTGAATTTTTTATATTTAGCTAGT  
CATTATGAAAAGTTGAAGGGTAGTCCAGAAGATAACGAACAAAAACAAT  
TGTTTGTGGAGCAGCATAAGCATTATTTAGATGAGATTATTGAGCAAATC  
AGTGAATTTTCTAAGCGTGTTATTTTAGCAGATGCCAATTTAGATAAAGTT  
CTTAGTGCATATAACAAACATAGAGACAAACCAATACGTGAACAAGCAG  
AAAATATTATTCATTTATTTACGTTGACGAATCTTGGAGCTCCCGCTGCTT  
TTAAATATTTTGATACAACAATTGATCGTAAACGATATACGTCTACAAA  
GAAGTTTTAGATGCCACTCTTATCCATCAATCCATCACTGGTCTTTATGAA  
ACACGCATTGATTTGAGTCAGCTAGGAGGTGACGGTTCCTCCAAGAAGAA  
GAGGAAAGTCTCGAGCGGTGGAGCTGCAGGATGA

**A**

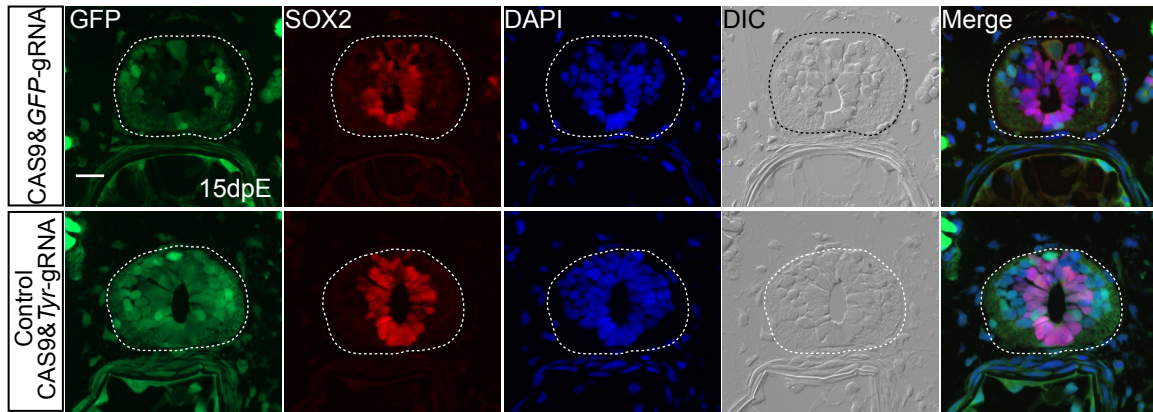

**B**

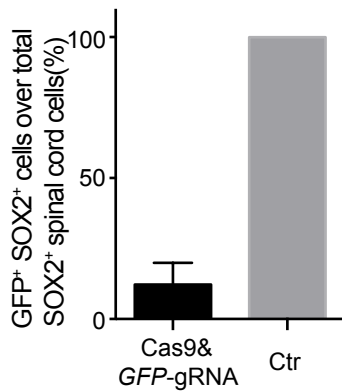

**C**

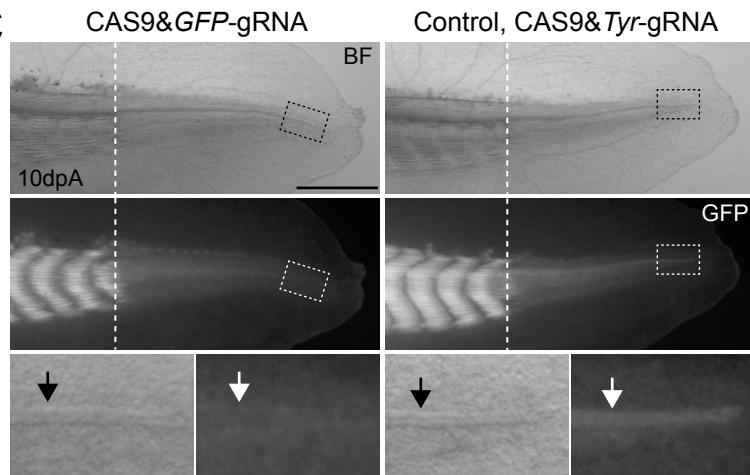

**D**

*GFP-gRNA* targeting sequence  
 5' ACGTAAACGGCCACAAGTTCAGCGTGTCCGGCGAGGGCGAGGGCGATGCCACCT 3' Template

2/20 5' ACGTAAACGGCCACAAGTTCAGCGTGTCCGGCGAGGGCGAGGGCGATGCCACCT 3' un-modified  
 1/20 5' ACGTAAACG-----GCCACCT 3' 38nt del  
 1/20 5' ACGTAAACGGC-----GAGGGCGAGGGCGATGCCACCT 3' 21nt del  
 1/20 5' ACGTAAACGGCCACAA-----GAGGGCGAGGGCGATGCCACCT 3' 16nt del  
 1/20 5' ACGTAAACGGCCACAAGT-----CCGGCGAGGGCGAGGGCGATGCCACCT 3' 9nt del  
 1/20 5' ACGTAAACGGCCACAAGTT-----GGCGAGGGCGAGGGCGATGCCACCT 3' 10nt del  
 2/20 5' ACGTAAACGGCCACAAGTTCA-----CGGGCGAGGGCGAGGGCGATGCCACCT 3' 7nt del  
 2/20 5' ACGTAAACGGCCACAAGTTCAG----TCCGGCGAGGGCGAGGGCGATGCCACCT 3' 4nt del  
 1/20 5' ACGTAAACGGCCACAAGTTCAG-----CGAGGGCGAGGGCGATGCCACCT 3' 9nt del  
 2/20 5' ACGTAAACGGCCACAAGTTCAG-----GGCGAGGGCGAGGGCGATGCCACCT 3' 7nt del  
 1/20 5' ACGTAAACGGCCACAAGTTCAGCG-----GGCGAGGGCGATGCCACCT 3' 10nt del  
 2/20 5' ACGTAAACGGCCACAAGTTCAGCGT--CCGGCGAGGGCGAGGGCGATGCCACCT 3' 2nt del

*GFP-gRNA* targeting sequence  
 5' ACGTAAACGGCCACAAGTTCAGCGT-----GTCCGGCGAGGG 3' Template

2/20 5' ACGTAAACGGCCACAAGTTCAGCGTt-----GTCCGGCGAGGG 3' 1nt ins  
 1/20 5' ACGTAAACGGCCACAAGTTCAGCGTtcagttcaGTCCGGCGAGGG 3' 8nt ins

**Supplementary Figure S1. Knockout of *GFP* in the axolotl spinal cord NSCs.**

(A) GFP fluorescence (green), SOX2 (red) immunofluorescence combined with DAPI (blue) and DIC images of 10  $\mu\text{m}$  cross-cryosections show the massive loss of GFP expression in NSCs (SOX2<sup>+</sup>) electroporated with CAS9&*GFP*-gRNA (upper panel) compared to the control (CAS9&*GFP*-gRNA, lower panel). Dotted lines define the spinal cord area. dpE, day post electroporation; Scale bar, 50  $\mu\text{m}$ .

(B) Quantification the percentage of GFP<sup>+</sup> cells over total spinal cord SOX2<sup>+</sup> NSCs. Loss of GFP expression is observed in approximately 90% spinal cord SOX2<sup>+</sup> NSCs. Data are collected from four CAS9&*GFP*-gRNA electroporated animals and four controls (4-5 cross cryosections per animals). Error bars, SD.

(E) Bright field (BF, upper panels) and GFP fluorescence (middle panels) images of 10-day regenerates from CAGGS-*GFP* transgenic axolotls electroporated with CAS9&*GFP*-gRNA (left panel) or CAS9&*Tyr*-gRNA (control, right panel) into the spinal cord lumen. Lower panel shows higher-magnification images of regenerating spinal cord area of corresponding rectangles. Note: there is a clear loss of GFP expression in the regenerating spinal cord tube treated with CAS9&*GFP*-gRNA compared to the control. Dotted lines indicate the amputation plans; arrows indicate the spinal cord; dpA, day post amputation. Scale bar, 2 mm.

(F) Sequence analysis of the *GFP* genomic locus in a single 10-day regenerated spinal cord electroporated with CAS9&*GFP*-gRNA. Nucleotides in red are the gRNA targeting sequence; nucleotides in green are the PAM sequence. Note: majority of the cloned PCR products include modifications at the target site, most of them with deletions (del), few with insertions (ins).

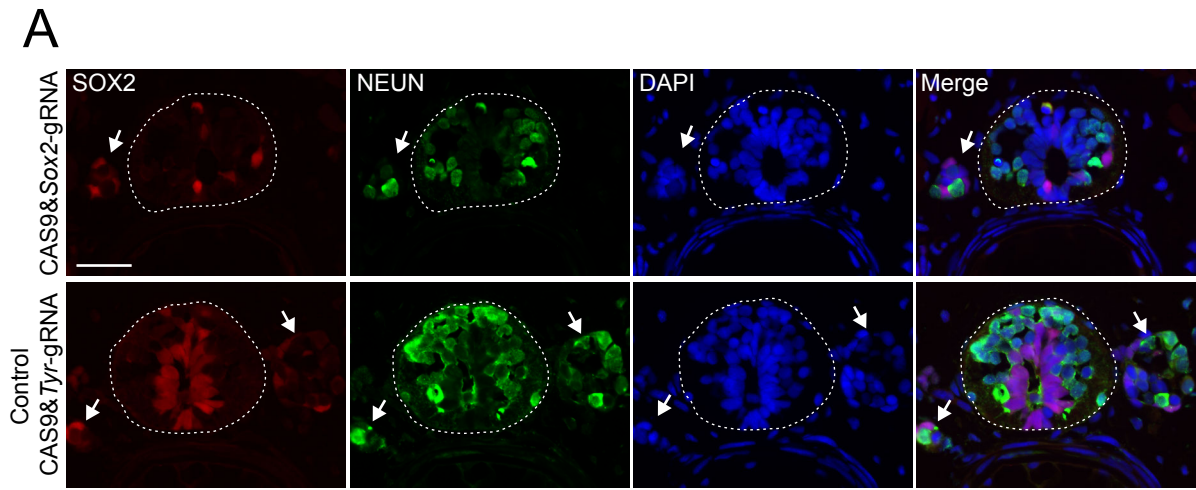

**B**

*Sox2*-gRNA targeting sequence

5' ATGATGGAGACCGACCTGAAGCCCGCCCGCAGCAGACCTCCACCAACC 3' Template

|      |    |                                                     |    |             |
|------|----|-----------------------------------------------------|----|-------------|
| 5/20 | 5' | ATGATGGAGACCGACCTGAAGCCCGCCCGCAGCAGACCTCCACCAACC    | 3' | un-modified |
| 1/20 | 5' | ATGATGGAGA-----CAGACCTCCACCAACC                     | 3' | 26nt del    |
| 1/20 | 5' | ATGATGGAGACCGA-----CCCGCAGCAGACCTCCACCAACC          | 3' | 14nt del    |
| 1/20 | 5' | ATGATGGAGACCGACCTGAAGCC-----GCAGCAGACCTCCACCAACC    | 3' | 9nt del     |
| 2/20 | 5' | ATGATGGAGACCGACCTGAAGCC-----CCCGCAGCAGACCTCCACCAACC | 3' | 5nt del     |
| 1/20 | 5' | ATGATGGAGACCGACCTGAAGCC-----CGCAGCAGACCTCCACCAACC   | 3' | 6nt del     |
| 3/20 | 5' | ATGATGGAGACCGACCTGAAGCC-----CCCGCAGCAGACCTCCACCAACC | 3' | 4nt del     |
| 1/20 | 5' | ATGATGGAGACCGACCTGAAGCC-----CAGCAGACCTCCACCAACC     | 3' | 7nt del     |
| 1/20 | 5' | ATGATGGAGACCGACCTGAAGCC-----CGCAGCAGACCTCCACCAACC   | 3' | 4nt del     |
| 1/20 | 5' | ATGATGGAGACCGACCTGAAGCC-----CAGCAGACCTCCACCAACC     | 3' | 5nt del     |
| 2/20 | 5' | ATGATGGAGACCGACCTGAAGCC-----AGCAGACCTCCACCAACC      | 3' | 5nt del     |
| 1/20 | 5' | ATGATGGAGACCGACCTGAAGCC-----CA-ACCTCCACCAACC        | 3' | 8nt del/ins |

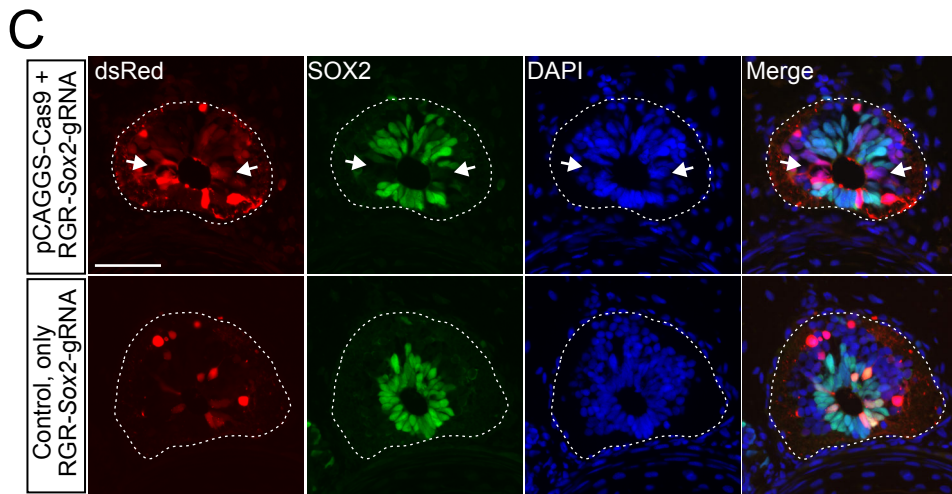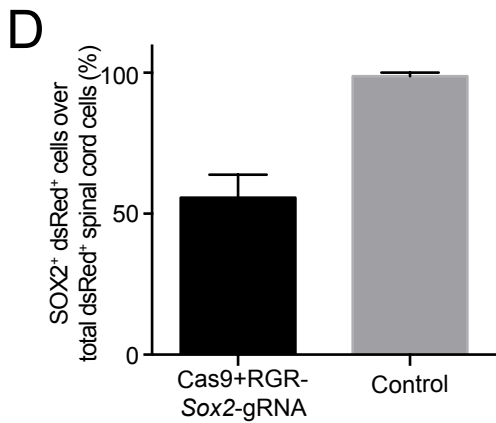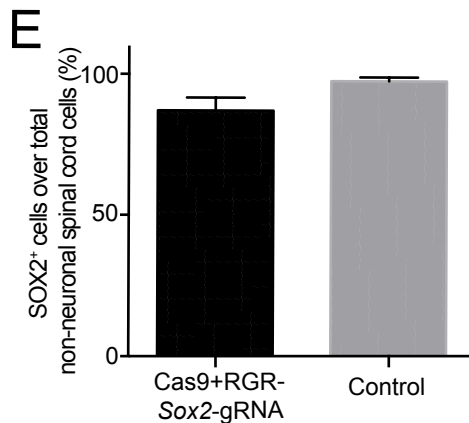

**Supplementary Figure S2. Knockout of *Sox2* in the axolotl spinal cord NSCs.**

(A) Immunofluorescence for SOX2 (red), NEUN (green) combined with DAPI (blue) on 10  $\mu\text{m}$  cross-cryosections shows the massive loss of SOX2 immunoactivity in NSCs at 15 days post electroporation of CAS9&*GFP*-gRNA (upper panel) compared to the CAS9&*Tyr*-gRNA control (lower panel). Note: SOX2 (labeling NSCs) and NEUN (labeling neurons) expression is mutually exclusive in the spinal cord in the control (lower panel). Dotted lines define the spinal cord areas; Arrows indicate DRG. Scale bar, 100  $\mu\text{m}$ .

(B) Sequence analysis of the *Sox2* genomic locus in a single 6-day regenerating spinal cord electroporated with CAS9&*Sox2*-gRNA. Nucleotides in red are the complementary sequence of gRNA binding site; nucleotides in green are the complementary of PAM sequence. Note: majority of the cloned PCR products include modifications at the target site.

(C) Fluorescence images of dsRed (red), immunofluorescence for SOX2 (green) combined with DAPI (blue) on 10  $\mu\text{m}$  cryosections showing the loss of SOX2 expression in a subpopulation of dsRed-labeled spinal cord cells (arrows) at 20-days post electroporation of CAGGS-*Cas9* and CMV-dsRed-RGR-*Sox2*-gRNA plasmids (pCAGGS-*Cas9*+RGR-*Sox2*-gRNA, upper panel) compared to control (only RGR-*Sox2*-gRNA plasmid, lower panel). Dotted lines define the spinal cord area. Scale bar, 100  $\mu\text{m}$ .

(D and E) Quantification of the percentage of (D) SOX2<sup>+</sup> cells over electroporated dsRed<sup>+</sup> spinal cord cells and (E) SOX2<sup>+</sup> cells over total non-neuronal spinal cord cells. Neurons are determined by their location and the shape of DAPI-stained nuclei (see Material and Methods). Data are collected from three CRISPR plasmids (Cas9+RGR-



*Sox2*-gRNA) electroporated animals and three controls (only CMV-dsRed-RGR-*Sox2*-gRNA plasmid) (4-5 cross cryosections per animals).

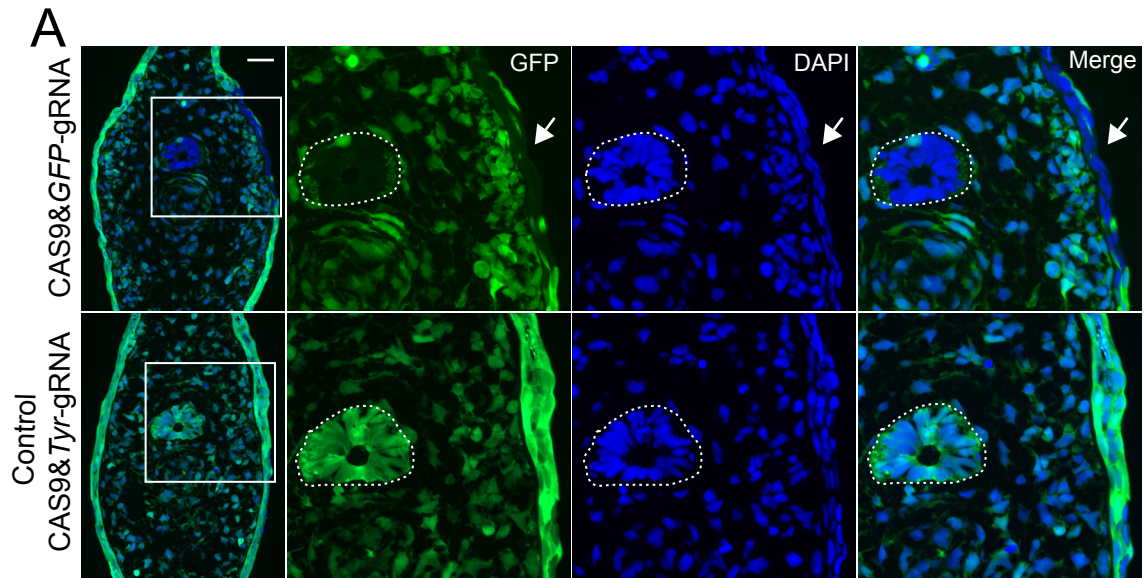

Fei et al. Supp\_Fig. 3

**Supplementary Figure S3. Knockout of *GFP* in the tail skin cells through CAS9-gRNA complex electroporation.**

(A) GFP fluorescence (green) combined with DAPI (blue) on 10  $\mu\text{m}$  cross-cryosections from 6-day tail regenerates shows the loss of GFP expression in the spinal cord, and a subpopulation of skin cells, when treated with CAS9&*GFP*-gRNA compared to the control. The boxed areas are shown at higher-magnification as single channel or merged images. Dotted lines define the spinal cord; arrows indicate the skin cells. Scale bar, 100  $\mu\text{m}$ .
